# Supplementary material for: Lipidomic analysis enables prediction of clinical outcomes in burn patients
Source: PubMed Central journal article supplement (PMC5159901; doi:10.1038/srep38707), 2016-12-16
Supplement: srep38707-s1.pdf [file srep38707-s1.pdf]

## **Supplementary Information**

SREP-16-28340A: Qi, P, Abdullahi, A, Stanojcic, M, Patsouris, D, and Jeschke, MG.  
“Lipidomic analysis enables prediction of clinical outcomes in burn patients”.

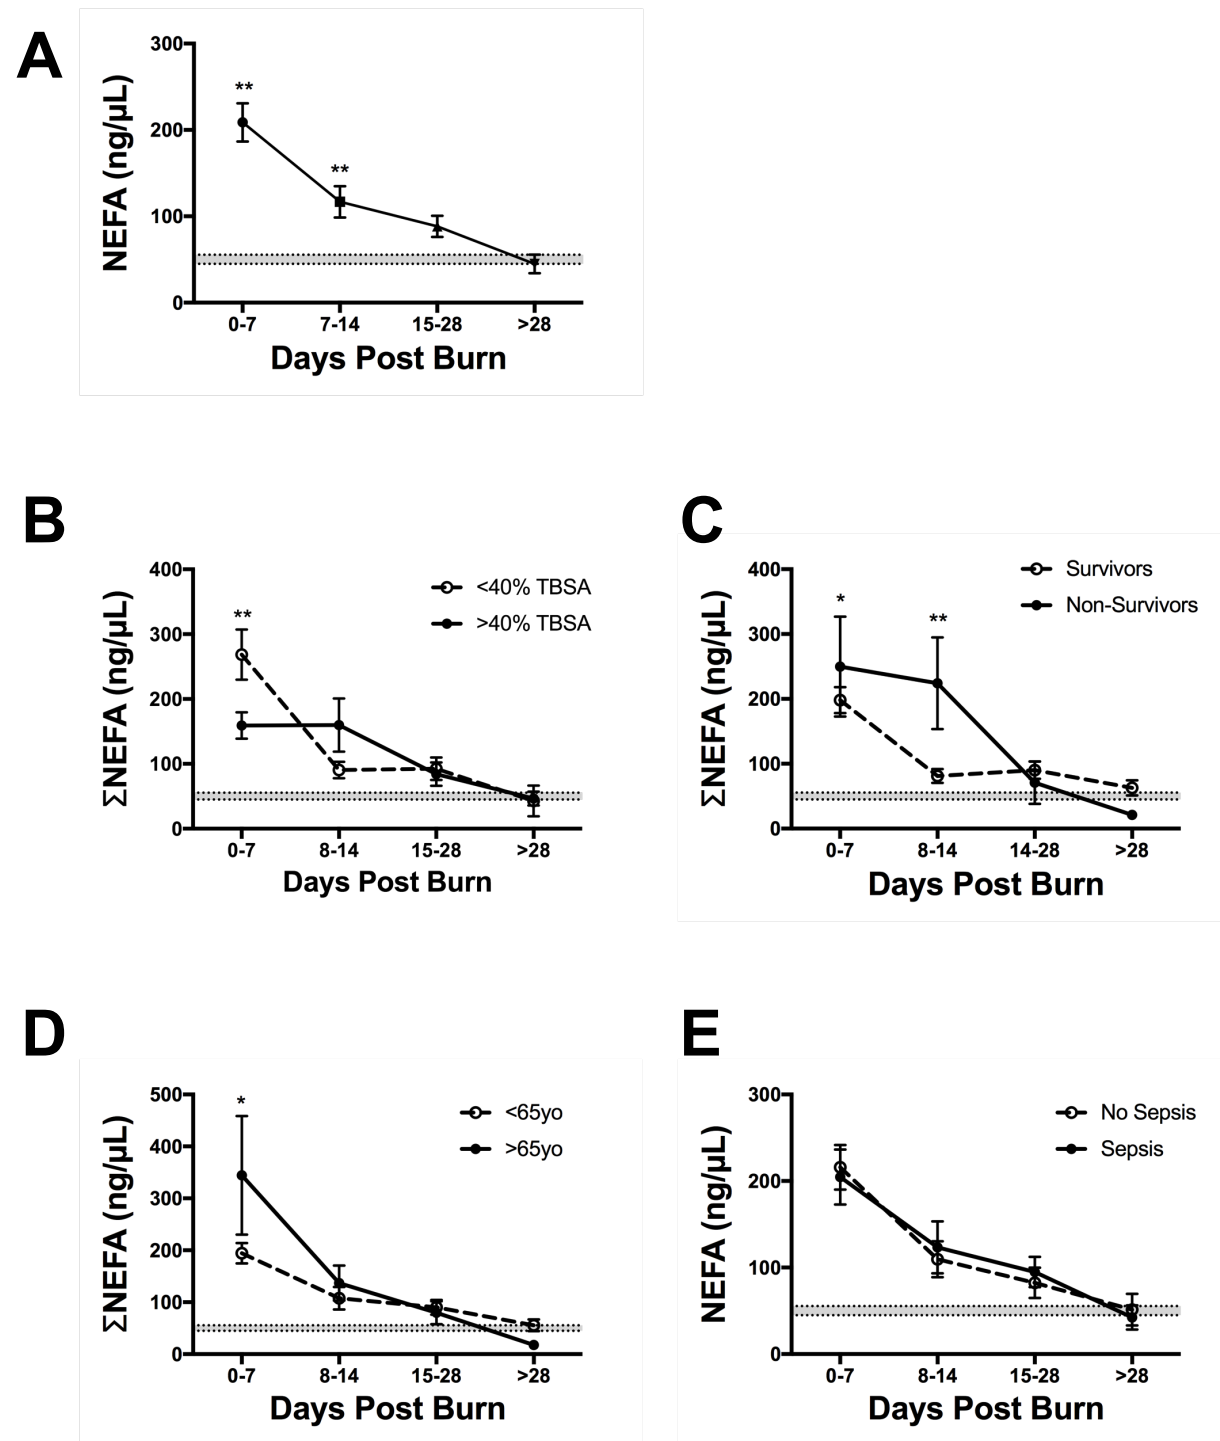

**Supplementary Figure 1:** Total NEFA concentration in burn patients over time stratified based on **A.** TBSA (<40% vs. >40%), **B.** mortality (survivors vs. non-survivors), **C.** Age (<65yo vs. >65yo), and **D.** Sepsis (Septic vs non-septic). Shaded area represents values for normal controls. All data expressed as mean  $\pm$  SEM. Asterisks indicate significance ( $p < 0.05$ ) between the stratified groups.

**A**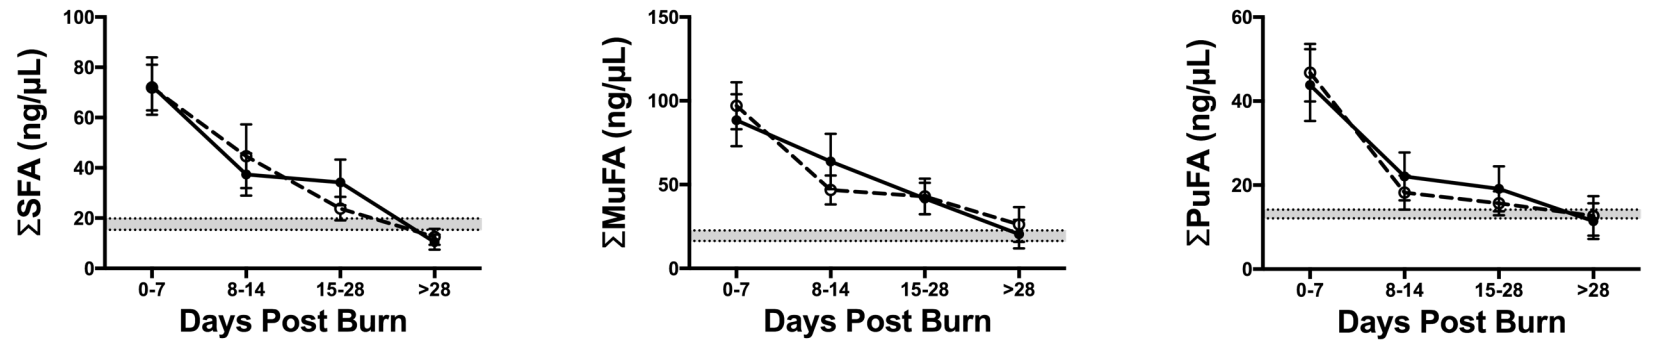**B**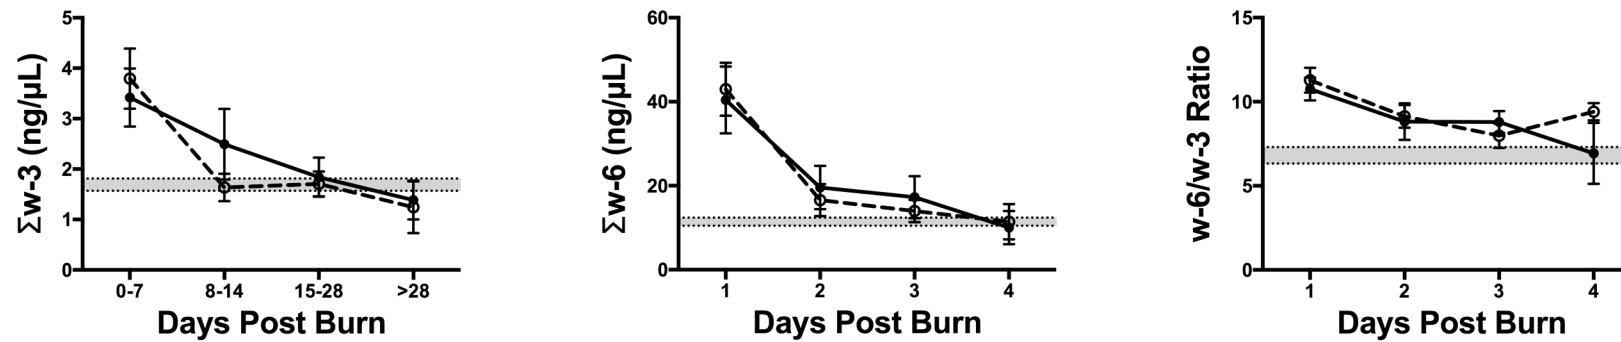**C**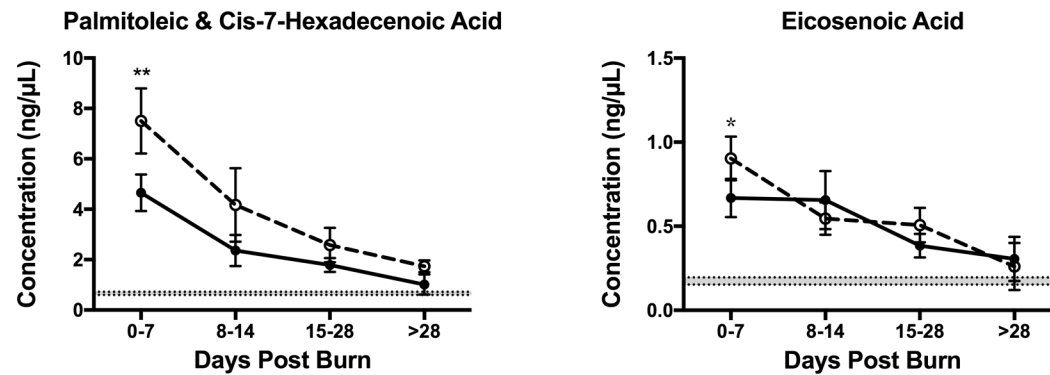

**Supplementary Figure 2:** FFA time course stratified based on septic status (septic vs non-septic). **A.** Major FFA species (SFA, MuFA, and PuFA). **B.** PuFAs sub-species (w-3, w-6, and w6:w3 ratio). **C.** Individual MuFAs (palmitoleic & cis-7-hexadecenoic, and eicosenoic acids). All data expressed as mean  $\pm$  SEM. *Asterisks* indicate significance ( $p < 0.05$ ) between adult vs elderly. Double symbols indicate  $p < 0.01$ .

Supplementary Table 1: Stratified Patient Demographics

|                            | Age       |           |         | TBSA      |           |         | Survival  |           |         | Sepsis    |           |         |
|----------------------------|-----------|-----------|---------|-----------|-----------|---------|-----------|-----------|---------|-----------|-----------|---------|
|                            | <65yo     | >65yo     | p-value | <40%      | >40%      | p-value | Lived     | Died      | p-value | Yes       | No        | p-value |
| Sample size, n             | 33 (72%)  | 13 (28%)  | n/a     | 27 (59%)  | 19 (41%)  | n/a     | 35 (76%)  | 11 (24%)  | n/a     | 26 (57%)  | 20 (44%)  | n/a     |
| Sex, male, n (%)           | 22 (67%)  | 5 (39%)   | 0.08    | 15 (56%)  | 12 (63%)  | 0.606   | 23 (66%)  | 4 (36%)   | 0.085   | 16 (62%)  | 11 (55%)  | 0.655   |
| Age, mean (years)          | 40 ± 3    | 72 ± 2    | <0.001  | 52 ± 4    | 45 ± 4    | 0.025   | 45 ± 3    | 64 ± 5    | 0.003   | 50. ± 4   | 48 ± 5    | 0.373   |
| Total TBSA (%)             | 41 ± 3    | 30 ± 3    | 0.02    | 28 ± 1    | 51 ± 2    | <0.0001 | 38 ± 2    | 37 ± 4    | 0.749   | 38 ± 3    | 37 ± 3    | 0.736   |
| LOS (days)                 | 45 ± 5    | 39 ± 5    | 0.432   | 35 ± 3    | 55 ± 7    | 0.006   | 47 ± 4    | 32 ± 6    | 0.075   | 48 ± 5    | 36 ± 6    | 0.105   |
| LOS/TBSA (Days/%)          | 1.1 ± 0.1 | 1.4 ± 0.2 | 0.222   | 1.3 ± 0.1 | 1.1 ± 0.1 | 0.279   | 1.2 ± 0.1 | 1.0 ± 0.3 | 0.361   | 1.3 ± 0.1 | 1.0 ± 0.1 | 0.105   |
| Number of ORs, average (n) | 4.8 ± 0.5 | 4.0 ± 0.5 | 0.341   | 3.7 ± 0.4 | 5.8 ± 0.7 | 0.005   | 4.9 ± 0.5 | 3.6 ± 0.5 | 0.128   | 5.5 ± 0.5 | 3.5 ± 0.5 | 0.008   |
| Inhalation injury, n (%)   | 18 (55%)  | 6 (46%)   | 0.608   | 14 (52%)  | 10 (53%)  | 0.958   | 16 (46%)  | 8 (73%)   | 0.118   | 24 (92%)  | 2 (8%)    | <0.0001 |
| Sepsis, n (%)              | 20 (39%)  | 6 (46%)   | 0.373   | 15 (56%)  | 11 (58%)  | 0.875   | 18 (51%)  | 8 (73%)   | 0.214   | 26 (100%) | 0 (0%)    | n/a     |
| MOF, n (%)                 | 2 (6%)    | 1 (8%)    | 0.840   | 1 (4%)    | 2 (11%)   | 0.356   | 1 (3%)    | 2 (18%)   | 0.073   | 3 (12%)   | 0 (0%)    | 0.116   |
| Mortality, n (%)           | 4 (12%)   | 7 (54%)   | 0.003   | 7 (26%)   | 4 (21%)   | 0.703   | 0 (0%)    | 11 (100%) | n/a     | 8 (31%)   | 3 (15%)   | 0.214   |

TBSA = total body surface area; OR = operations; LOS = length of stay; MOF = multi-organ failure. Data presented as mean ± SEM or percentages.
